# Supplementary material for: Lemon Extract Reduces Angiotensin Converting Enzyme (ACE) Expression and Activity and Increases Insulin Sensitivity and Lipolysis in Mouse Adipocytes
Source: PubMed Central journal article supplement (PMC7468735; doi:10.3390/nu12082348), 2020-08-06
Supplement: nutrients-12-02348-s001.pdf [file nutrients-12-02348-s001.pdf]

| Lemon Extract Dose ( $\mu\text{g/ml}$ ) | Run 1    | Run 2    | Run 3    | Average fold change | SD       |
|-----------------------------------------|----------|----------|----------|---------------------|----------|
| 0                                       | 0.987449 | 1        | 0.9897   | 0.992383            | 0.006692 |
| 50                                      | 0.489014 | 0.438364 | 0.423906 | 0.450428            | 0.034189 |
| 100                                     | 0.482344 | 0.520875 | 0.454776 | 0.485998            | 0.0332   |
| 500                                     | 0.641399 | 0.639431 | 0.538766 | 0.606532            | 0.058695 |

**Table S1:** Quantification of protein expression using Image J software.

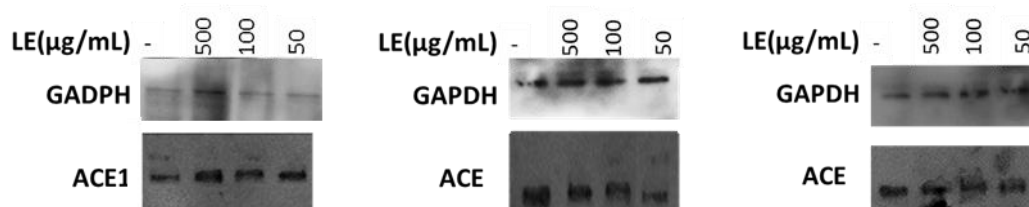

**Figure S1:** Western blot of ACE and GAPDH. LE: Lemon Extract
